# Supplementary figures and images for: Immunogenicity and Protective Capacity of Sugar ABC Transporter Substrate-Binding Protein against Streptococcus suis Serotype 2, 7 and 9 Infection in Mice
Source: MDPI journal article supplement (doi:10.3390/vaccines12050544), 2024-05-15

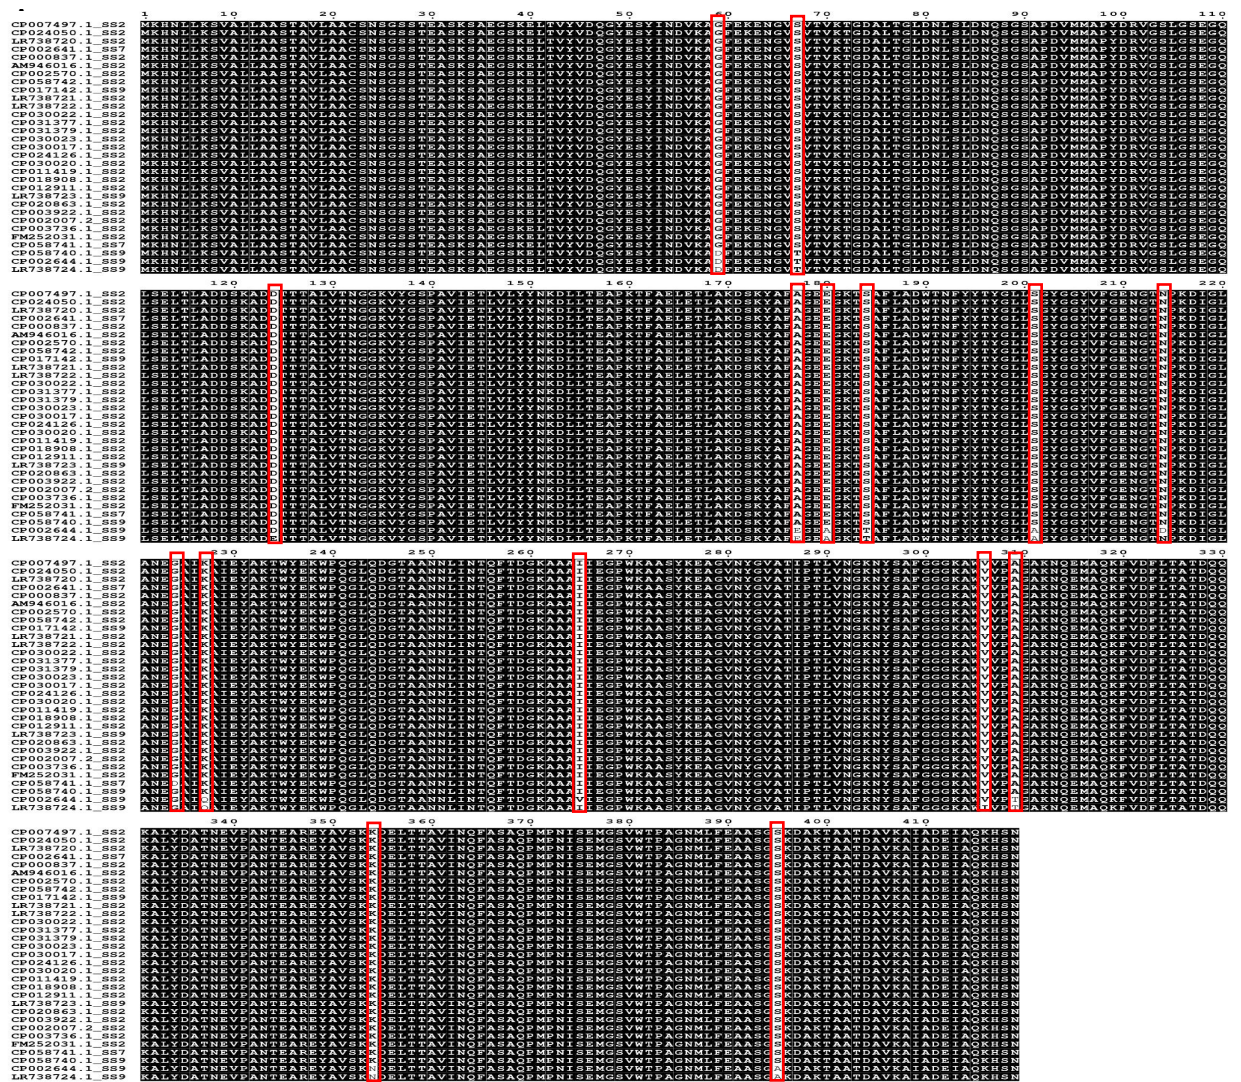

Figure S1. Conservation of S-ABC gene in *S. suis* strains.

Supplement: s1 [file s1]

A

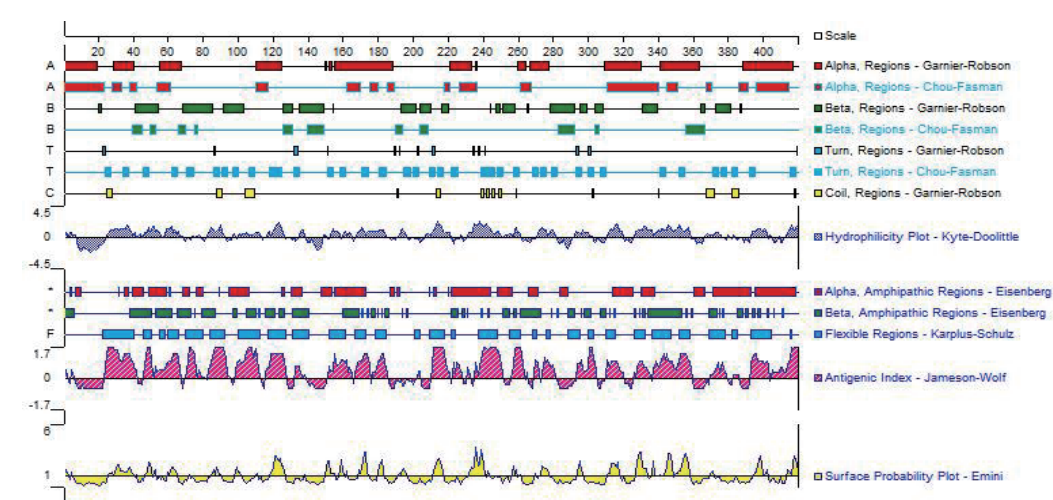

B

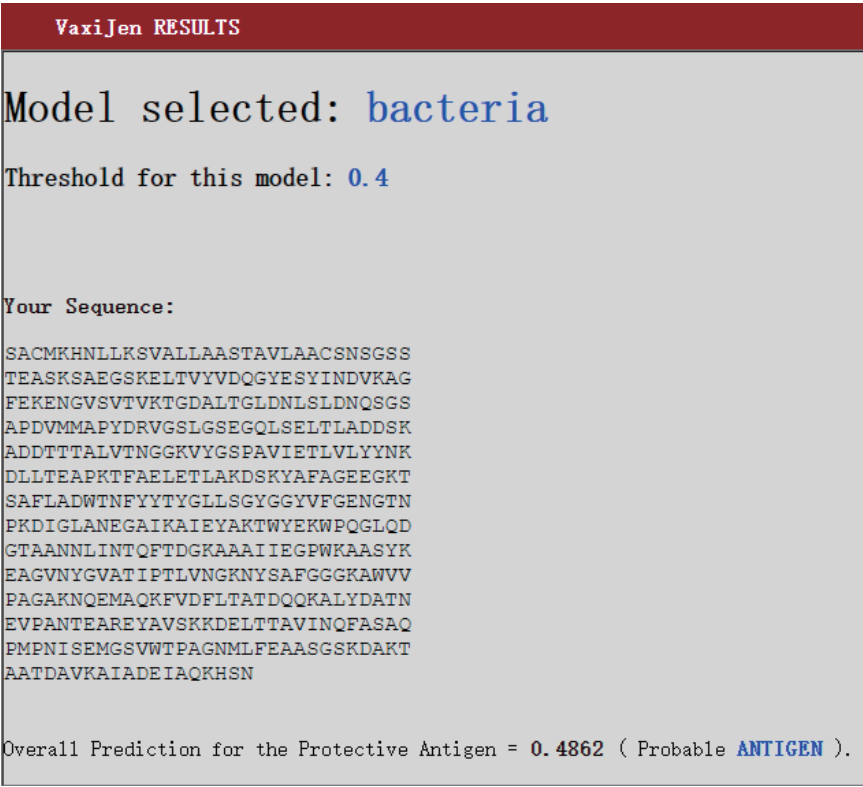

Figure S2. Antigenicity analysis.

Supplement: s1 [file s1]
